# Supplementary material for: Impact of flexible succinate connectors on the formation of tetrasulfonylcalix[4]arene based nano-sized polynuclear cages: structural diversity and induced chirality study
Source: Royal Society of Chemistry journal article supplement (doi:10.1039/d1ce01482j), 2021-11-26
Supplement: d1ce01482j1.pdf [file d1ce01482j1.pdf]

# **Impact of flexible succinate connectors on the formation of tetrasulfonylcalix[4]arene based Nano-sized polynuclear cages: structural diversity and induced chirality study**

Mariia V. Kniazeva,<sup>a</sup> Alexander S. Ovsyannikov,<sup>a\*</sup> Aida I. Samigullina,<sup>a</sup> Daut R. Islamov,<sup>b</sup> Aidar T. Gubaidullin,<sup>a</sup> Pavel V. Dorovatovskii,<sup>d</sup> Vladimir A. Lazarenko,<sup>d</sup> Svetlana E. Solovieva,<sup>c</sup> Igor S. Antipin,<sup>c</sup> Sylvie Ferlay<sup>e\*</sup>

## **Electronic Supplementary Information**

## XRPD studies

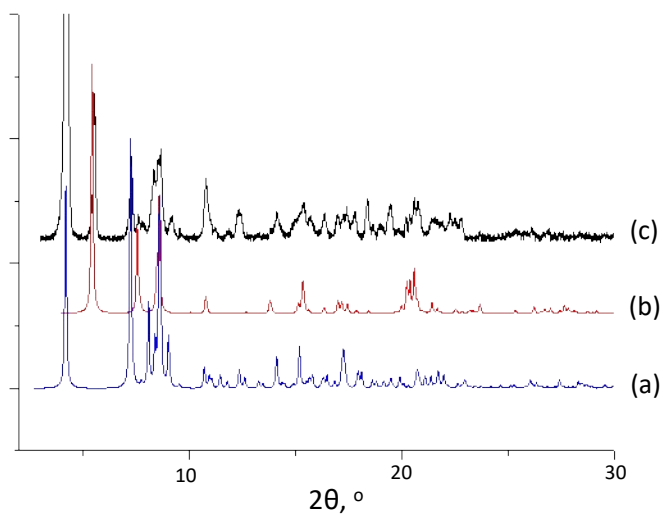

**Figure S1.** Comparison of simulated  $3_2\text{Co}_8(\text{suc})_4$  (a) and  $3_2\text{Co}_8(\text{suc})_4\text{-Co}$  (b) powder X-Ray diffraction (PXRD) diagrams with the experimental powdered compound of the freshly prepared compound (slow diffusion technique) (c) demonstrating the presence of both phases in the analyzed polycrystalline sample.

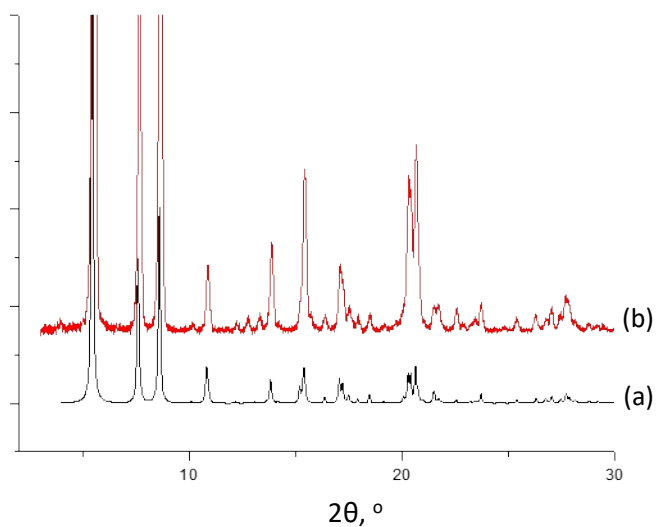

**Figure S2.** The powder X-Ray diffraction (PXRD) studies demonstrating the good match between the simulated (a) and experimental (b) patterns for  $3_2\text{Ni}_8(\text{suc})_4\text{-Ni}$ .

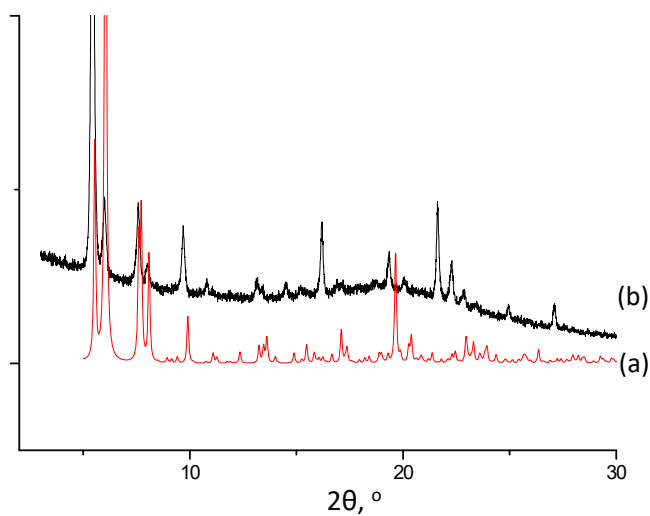

**Figure S3.** The powder X-Ray diffraction (PXRD) studies demonstrating the good match between the simulated (a) and experimental (b) patterns for  $3_2\text{Zn}_6(\text{suc})_2$ .

### TGA analysis

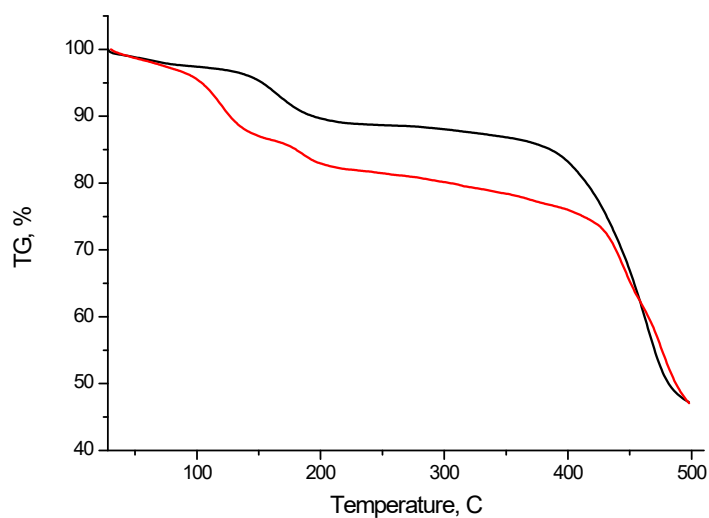

**Figure S4.** For obtained homogeneous compounds  $3_2\text{Ni}_8(\text{suc})_4\text{-Ni}$  (black) and  $3_2\text{Zn}_6(\text{suc})_2$  (red), TGA traces were recorded between 25 – 500°C at a rate of 5°/mn. For  $3_2\text{Ni}_8(\text{suc})_4\text{-Ni}$ , the observed mass loss is in good agreement with the quantity of solvate molecules (4H<sub>2</sub>O and 4DMF) molecules per crystalline unit established by XRD. In the case of  $3_2\text{Zn}_6(\text{suc})_2$ , it was found out that the crystalline unit contains 2H<sub>2</sub>O and 7DMF molecules in contrast to 2H<sub>2</sub>O molecules and 14DMF molecules established by XRD which indicates the relatively fast loss of solvate molecules by compound after separation from mother liquor.

## IR analysis

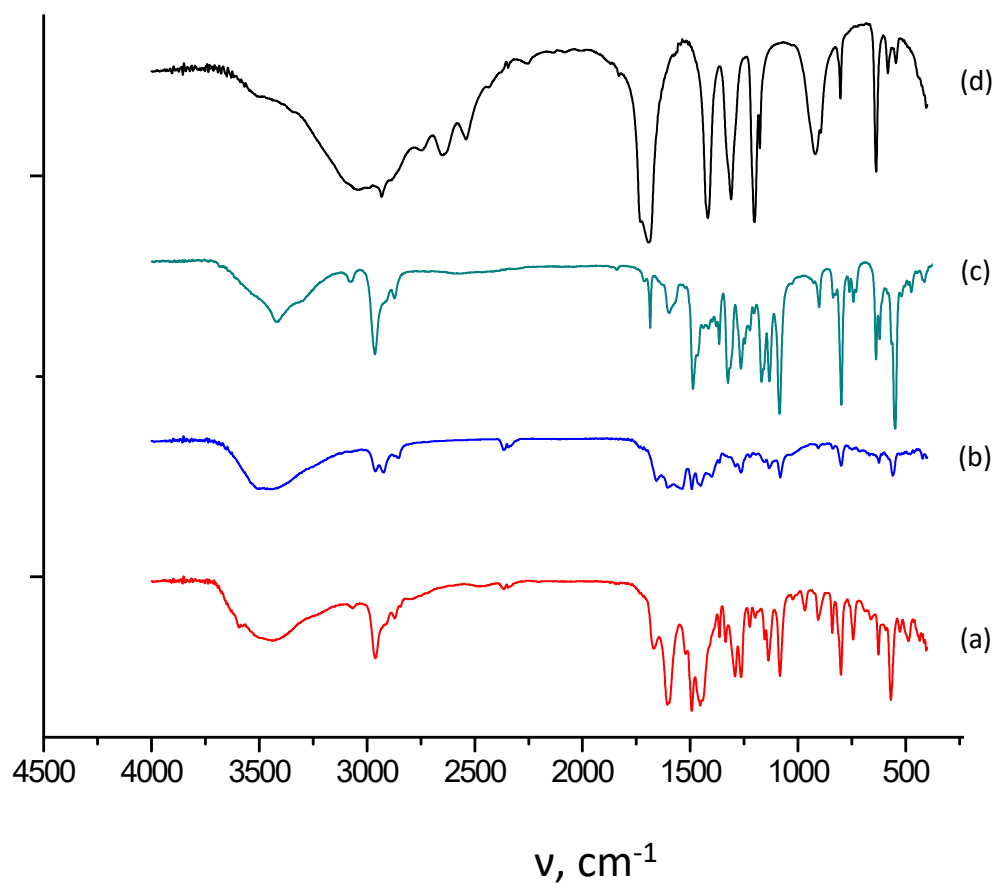

**Figure S5:** Comparison of IR-spectra recorded for pure  $3_2\text{Ni}_8(\text{suc})_4\text{-Ni}$  (a),  $3_2\text{Zn}_6(\text{suc})_2$  (b), 3-4H (c) and succinic acid (d).
